# Supplementary material
Source: Research Square preprint supplement (doi:10.21203/rs.3.rs-9714024/v1)
Supplement: Supplementary file 1 [file 540fcfc6a4100772a8b84b03.docx]

Supplementary Figure


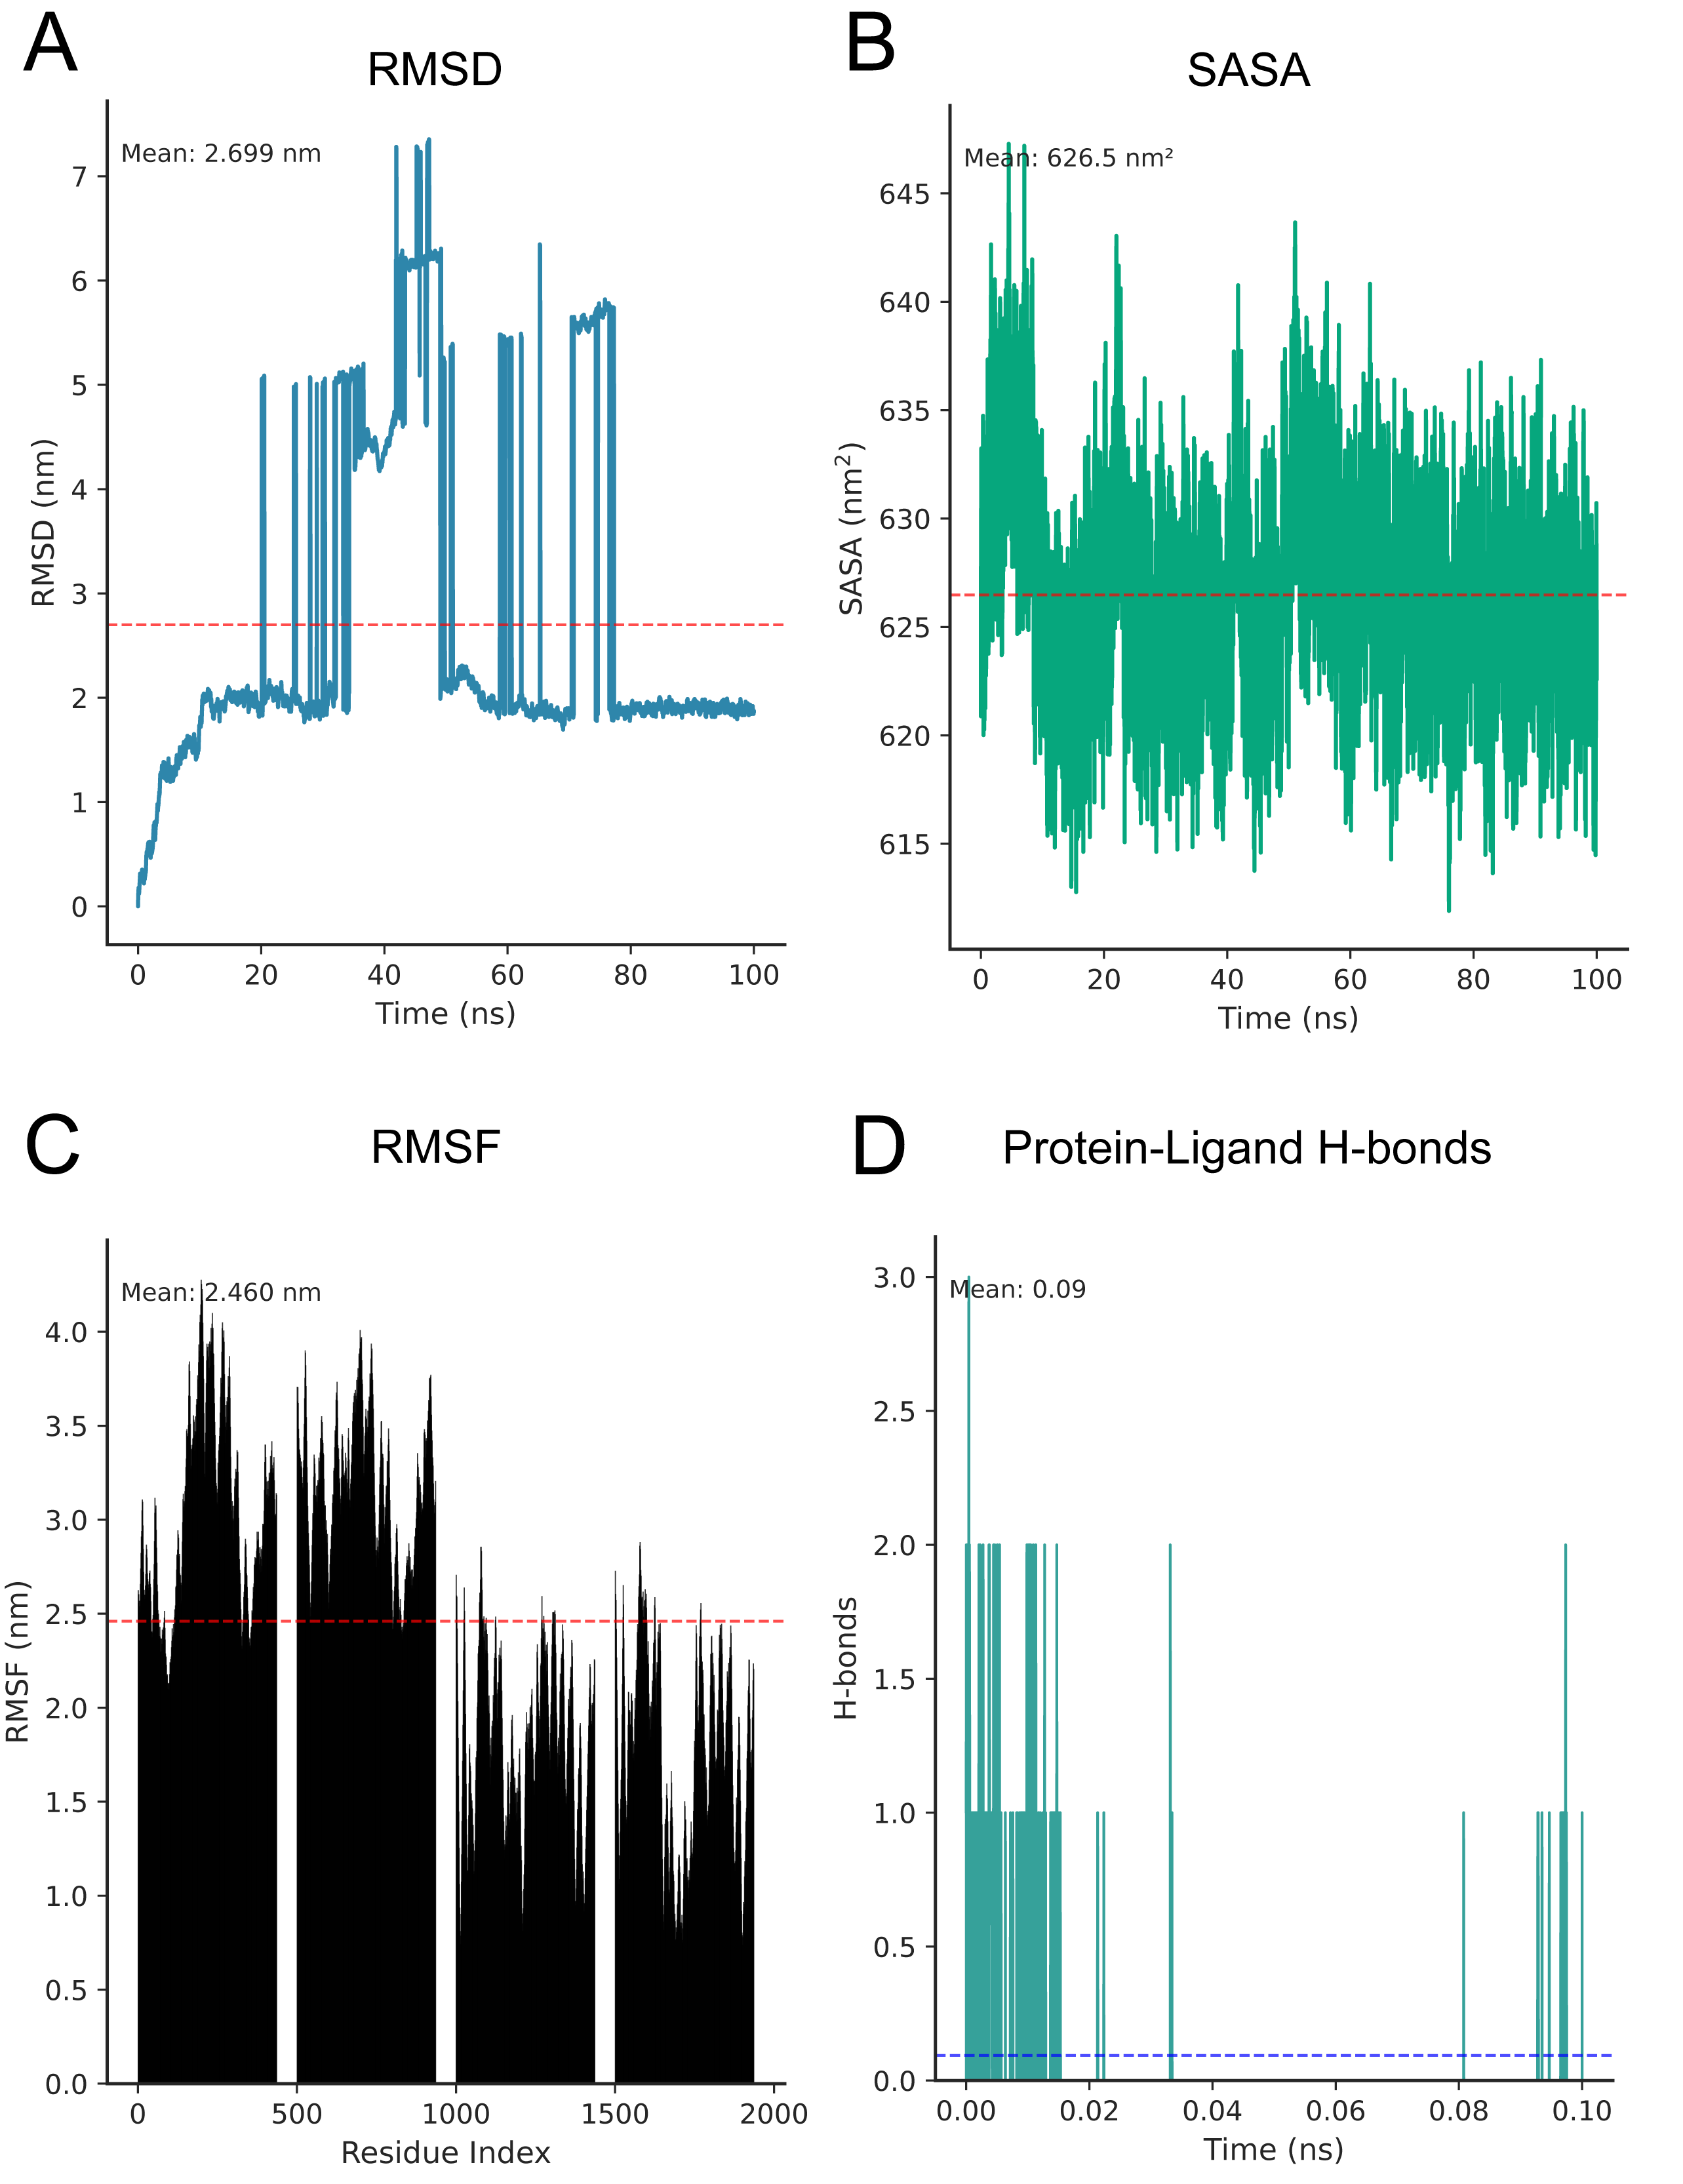


**Figure S1. Molecular dynamics simulation results.** (A) RMSD. (B) SASA. (C) RMSF. (D) Number of hydrogen bonds.
